# Supplementary material for: Synthesis, characterization, antitumor potential, and investigation of mechanism of action of copper(ii) complexes with acylpyruvates as ligands: interactions with biomolecules and kinetic study
Source: PubMed Central journal article supplement (PMC9597287; doi:10.1039/d2ra05797b), 2022-10-26
Supplement: RA-012-D2RA05797B-s001.pdf [file RA-012-D2RA05797B-s001.pdf]

Synthesis, characterization, antitumor potential, and investigation of mechanism of  
action of copper(II) complexes with acylpyruvates as ligands: Interactions with  
biomolecules and kinetic study

Nenad Joksimović,<sup>a\*</sup> Jelena Petronijević,<sup>a</sup> Snežana Radisavljević,<sup>a</sup> Biljana Petrović,<sup>a</sup> Kristina  
Mihajlović,<sup>a</sup> Nenad Janković,<sup>b</sup> Emilija Milović,<sup>b</sup> Dušan Milivojević,<sup>c</sup> Bojana Ilić,<sup>d</sup> Ana Djurić<sup>e\*</sup>

<sup>a</sup>University of Kragujevac, Faculty of Science, Department of Chemistry, Radoja Domanovića  
12, 34000 Kragujevac, Serbia. E-mail: [nenad.joksimovic@pmf.kg.ac.rs](mailto:nenad.joksimovic@pmf.kg.ac.rs)

<sup>b</sup>University of Kragujevac, Institute for Information Technologies Kragujevac, Department of  
Sciences, Jovana Cvijića bb, 34000 Kragujevac, Serbia

<sup>c</sup>Vinča Institute of Nuclear Science University of Belgrade, P.O. Box 522, 11001, Belgrade,  
Serbia

<sup>d</sup>Clinic for Endocrinology, Diabetes and Metabolic Diseases, University Clinical Centre of  
Serbia, Belgrade, Serbia

<sup>e</sup>Institute of Oncology and Radiology of Serbia, Pasterova 14, 11000 Belgrade, Serbia

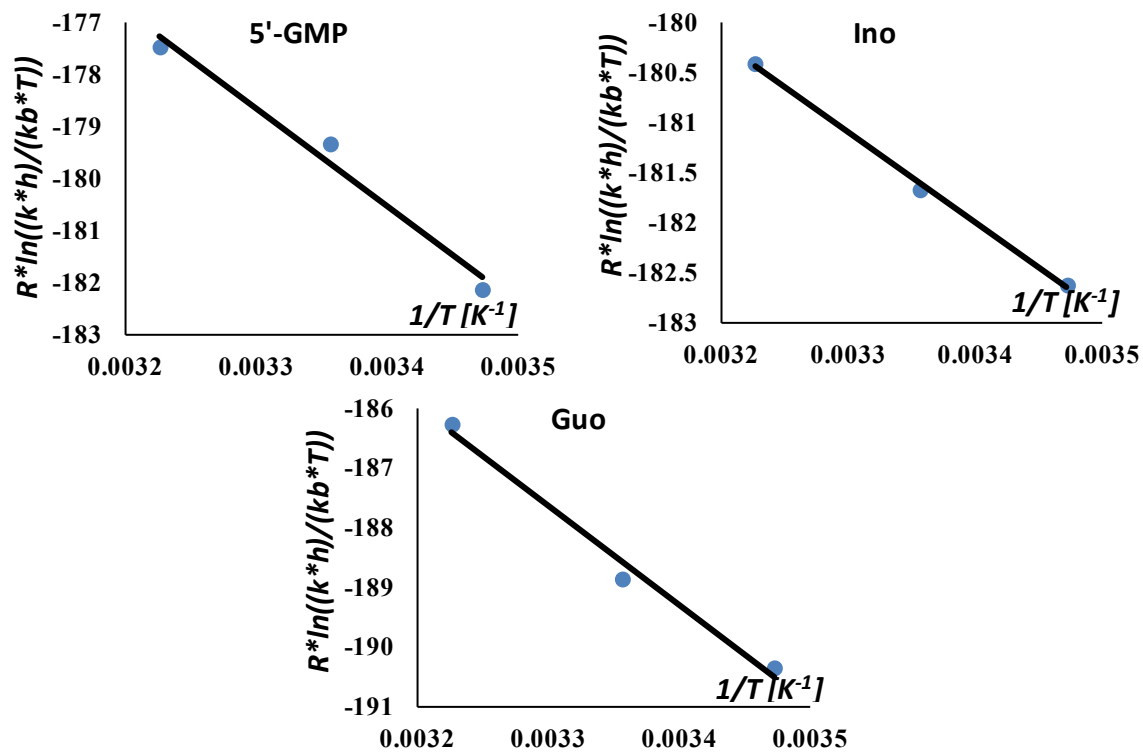

**Fig. S1.** Eyring plots for the reactions of copper(II) complex **F** with different nucleophiles in Hepes buffer (pH=7.2, 25mM Hepes).

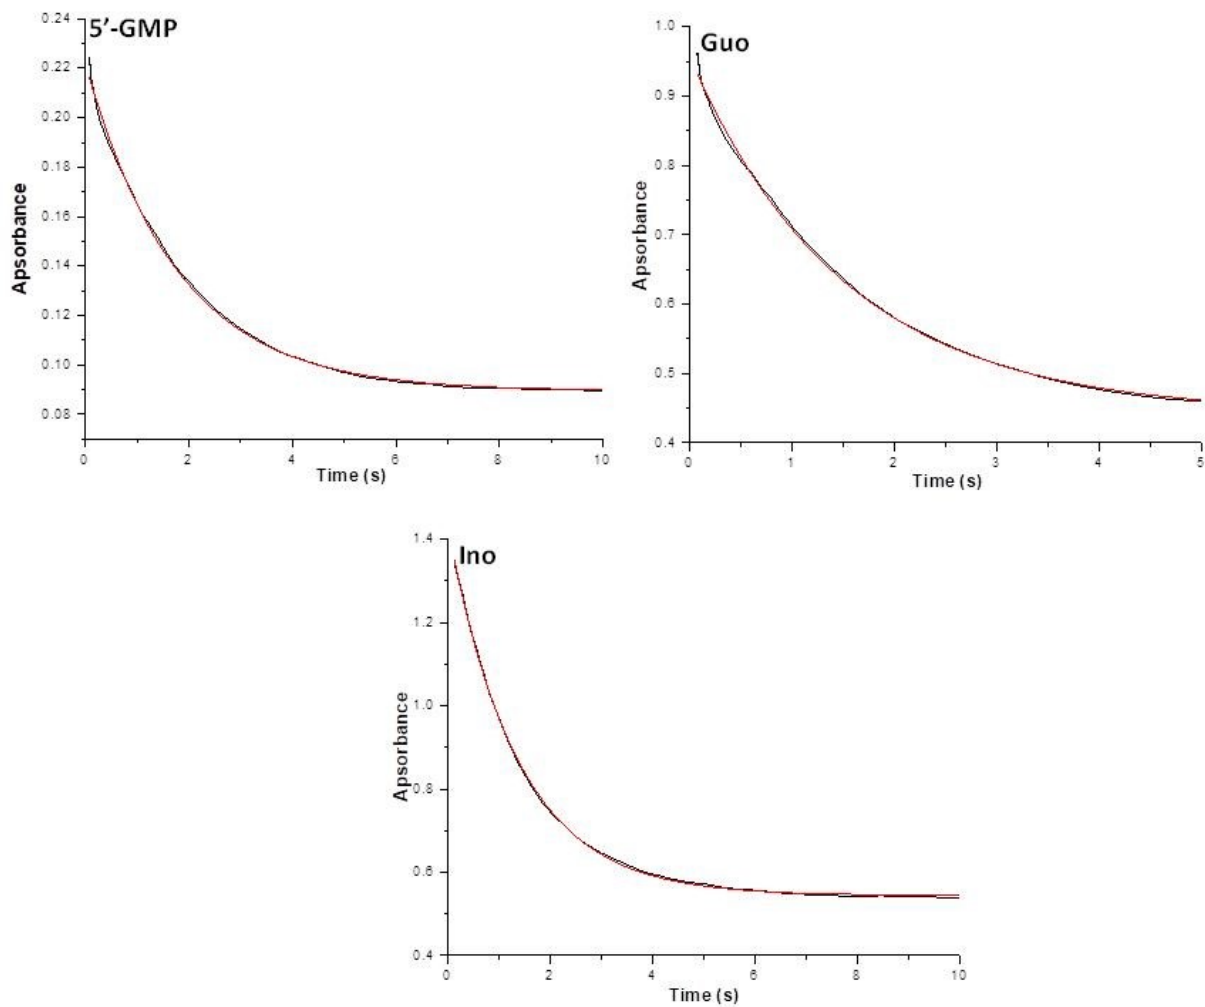

**Fig. S2.** Kinetic traces for the substitution reactions of copper(II) complexes and the nucleophiles.

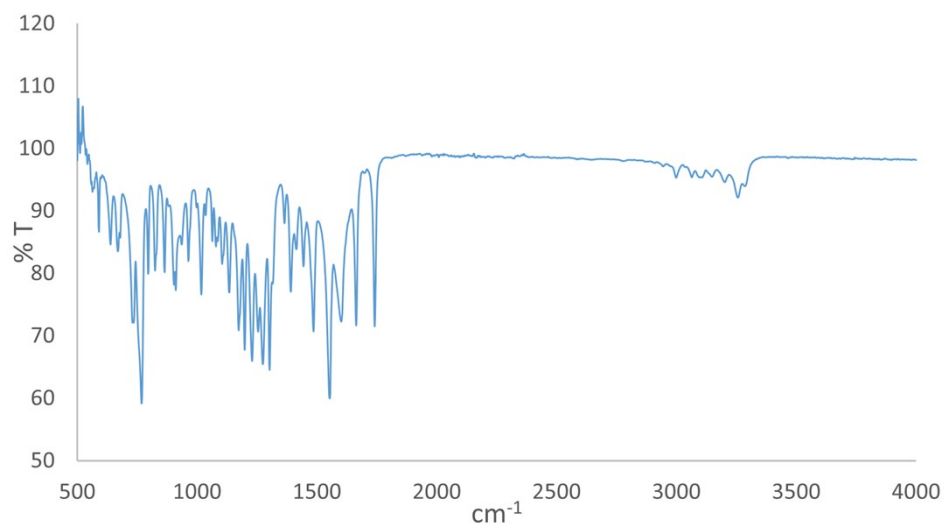

**Fig S3.** IR spectra of compound **A**

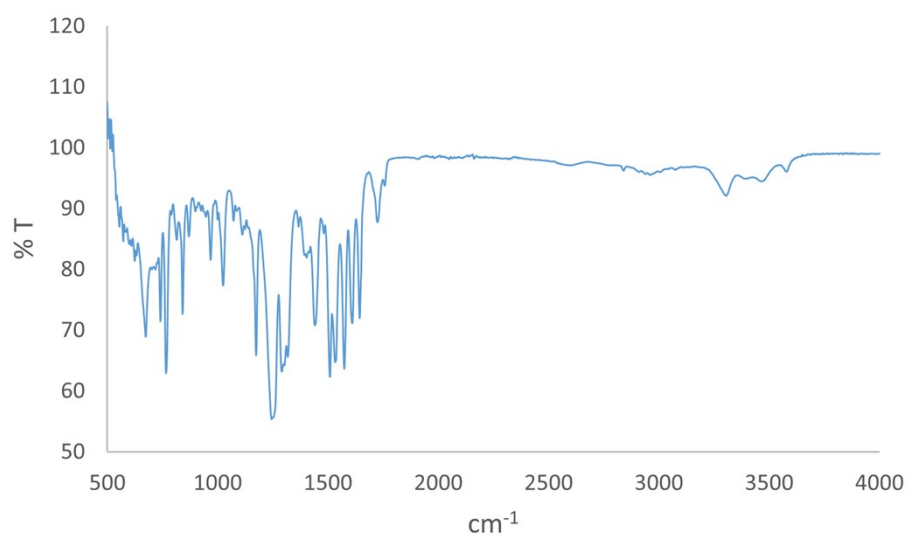

**Fig S4.** IR spectra of compound **B**

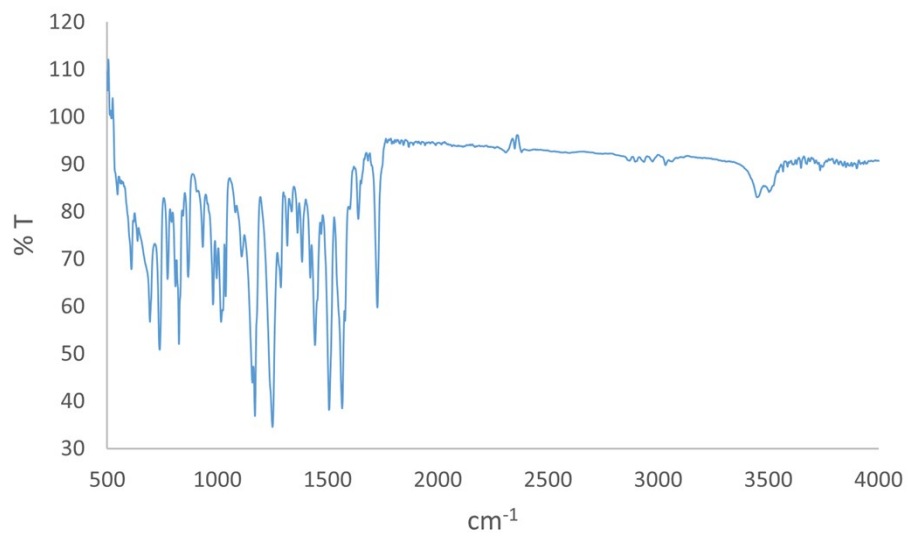

**Fig S5.** IR spectra of compound C

**Table S1.** Observed *pseudo*-first order rate constant as a function of the nucleophile concentration and temperature for the substitution reactions in 25mM Hepes buffer (pH = 7,2).

| T/K | 10 <sup>-5</sup> C <sub>L</sub> /M | k <sub>obs</sub> /s <sup>-1</sup> |            |            |
|-----|------------------------------------|-----------------------------------|------------|------------|
|     |                                    | <b>5'-GMP</b>                     | <b>Guo</b> | <b>Ino</b> |
| 288 | 5                                  | 0.680(7)                          | 0.512(6)   | 0.553(7)   |
|     | 7.5                                | 1.080(6)                          | 0.633(7)   | 0.810(7)   |
|     | 10                                 | 1.300(6)                          | 0.840(6)   | 1.093(6)   |
|     | 12.5                               | 1.698(7)                          | 1.071(7)   | 1.398(6)   |
|     | 17.5                               | 1.945(6)                          | 1.261(7)   | 1.618(6)   |
|     | 20                                 | 2.168(6)                          |            |            |
| 298 | 5                                  | 1.040(7)                          | 0.681(6)   | 0.600(6)   |
|     | 7.5                                | 1.546(7)                          | 0.793(6)   | 0.984(6)   |
|     | 10                                 | 1.963(6)                          | 1.050(7)   | 1.322(6)   |
|     | 12.5                               | 2.486(7)                          | 1.285(7)   | 1.564(7)   |
|     | 17.5                               | 2.860(6)                          | 1.630(6)   | 1.896(7)   |
|     | 20                                 | 3.080(6)                          |            |            |
| 308 | 5                                  | 1.480(6)                          | 0.944(7)   | 0.984(6)   |
|     | 7.5                                | 2.060(6)                          | 1.171(7)   | 1.368(7)   |
|     | 10                                 | 2.598(6)                          | 1.490(6)   | 1.794(6)   |
|     | 12.5                               | 3.197(6)                          | 1.873(7)   | 2.136(6)   |
|     | 17.5                               | 3.689(7)                          | 2.285(6)   | 2.496(6)   |
|     | 20                                 | 4.176(7)                          |            |            |
